# Supplementary material for: Large scale N-doped GNTs@a-SiOx(x=1–2)NPs: template-free one-step synthesis, and field emission and photoluminescence properties
Source: Royal Society of Chemistry journal article supplement (doi:10.1039/c8tc06614k), 2019-01-01
Supplement: c8tc06614k1.pdf [file c8tc06614k1.pdf]

## Supporting Information

### **Large Scale N-doped GNTs@a-SiO<sub>x(x=1~2)</sub>-NPs: Template-free one-step synthesis, field emission and photoluminescence properties**

Z. J. Li<sup>a</sup>, G. H. Qiu<sup>a</sup>, J. H. Zhang<sup>a</sup>, G. Y. Song<sup>a</sup>, Y. S. Lin<sup>b</sup>, A. L. Meng<sup>\*c</sup>, Q. D. Li<sup>a</sup>

---

*a. Key Laboratory of Polymer Material Advanced Manufacturing Technology of Shandong Provincial, College of Electromechanical Engineering, College of Sino-German Science and Technology, Qingdao University of Science and Technology, Qingdao 266061, P. R. China.*

*b. College of Materials Science and Engineering, Qingdao University of Science and Technology, Qingdao 266042, Shandong, P. R. China.*

*c. Key Laboratory of Sensor Analysis of Tumor Marker, Ministry of Education, School of Chemistry and Molecular Engineering, Qingdao University of Science and Technology, Qingdao, Shandong Province, 266042, China.*

**\* E-mail address: alanmengqust@163.com**

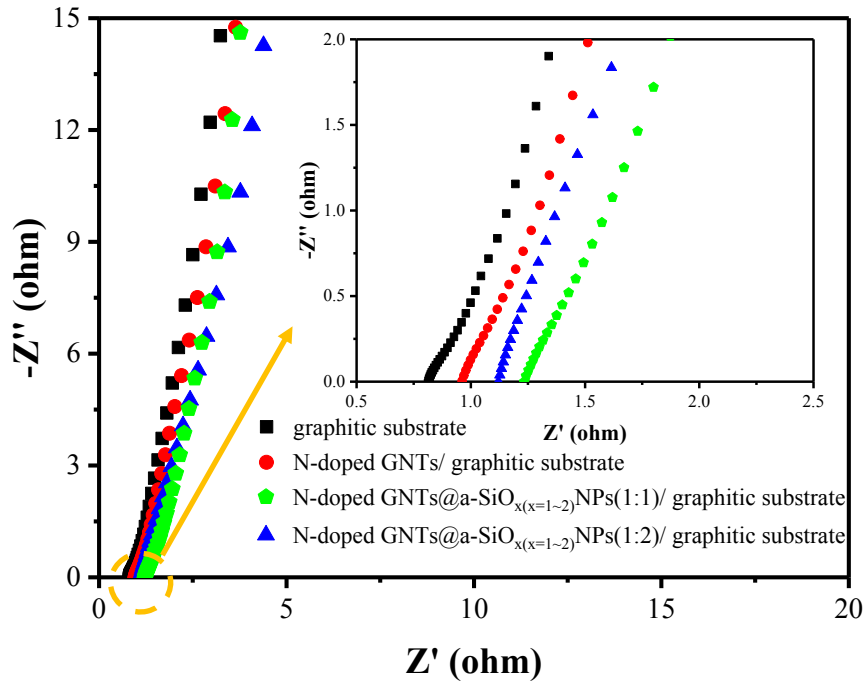

**Figure S1 Nyquist plots of the N-doped GNTs, N-doped GNTs@a-SiO<sub>x(x=1~2)</sub>NPs (1:1), N-doped GNTs@a-SiO<sub>x(x=1~2)</sub>NPs (1:2) grown on graphitic substrate, and the bare graphitic substrate (Insert shows the enlarged parts of Nyquist plots).**

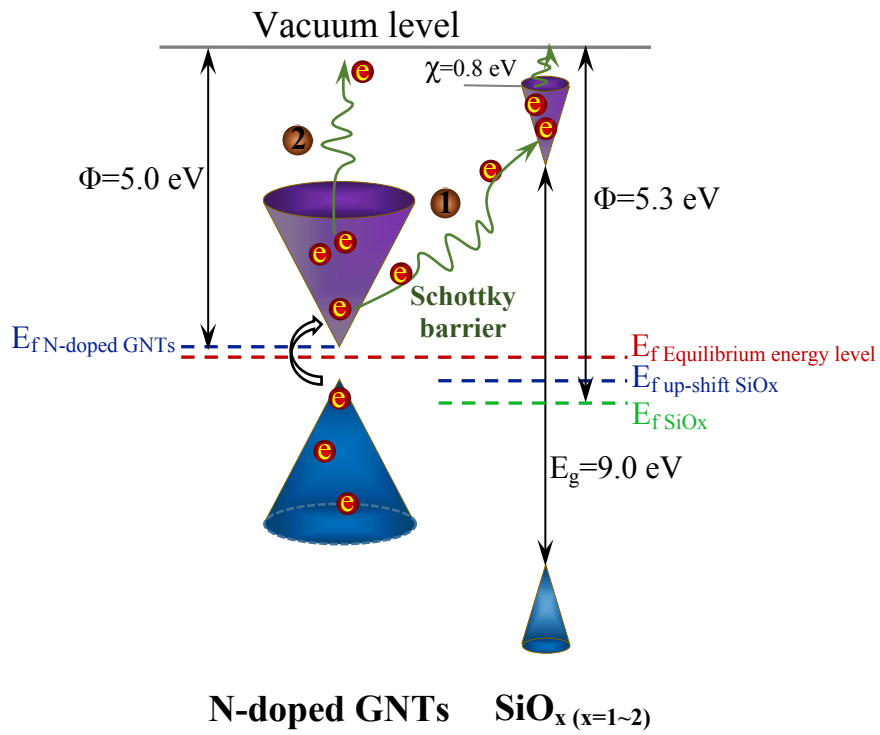

**Figure S2 Schematic band diagram of field emission for the N-doped GNTs@ $\text{SiO}_x(x=1-2)$ NPs**

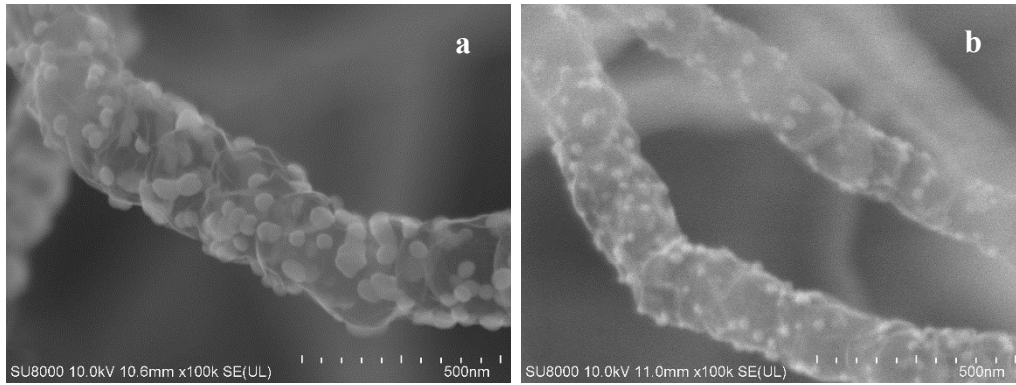

**Figure S3 (a) high resolution SEM image of N-doped GNTs@a-SiO<sub>x(x=1~2)</sub>NPs (1:1) after FE studies , (b) high resolution SEM image of N-doped GNTs@a-SiO<sub>x(x=1~2)</sub>NPs (1:2) after FE studies**
